# Supplementary material for: How are women living with HIV in France coping with their perceived side effects of antiretroviral therapy? Results from the EVE study
Source: PLoS One. 2017 Mar 6;12(3):e0173338. doi: 10.1371/journal.pone.0173338 (PMC5338806; doi:10.1371/journal.pone.0173338)
Supplement: S2 File — (XLSX) [file pone.0173338.s002.xlsx]

## Sheet: eve_coping
patid	medecin_evenements	changement_arv	orientation	prescription	dosage_arv	parce_que_vous_viviez	si_oui_arret_traitement	finalement_avez_vous	sol_yoga	sol_homeo	sol_travail	sol_nutri	sol_cannabis	sol_soutien	sol_kine	sol_autre
1	oui	2	1	2	1	non		oui, partiellement ou totalement	1	1	2	2	1	2	2	2
2	oui	1	1	1	2	non		oui, partiellement ou totalement	2	2	2	1	2	2	1	2
3	oui	1	2	1	2	non		non pas du tout	2	2	2	2	2	2	2	2
4	oui	2	1	2	2	non		non pas du tout	2	2	2	2	2	2	2	2
5	oui	2	1	2	2	non		oui, partiellement ou totalement	2	2	1	2	2	2	2	2
6	oui	2	1	2	2	non		oui, partiellement ou totalement	2	2	1	2	2	2	2	2
7	non					oui	j'ai pris la decision moi-même et ensuite j'en ai parle à mon medecin	oui, partiellement ou totalement	2	2	2	1	1	2	2	1
8	oui	1	1	1	2	oui	j'ai pris la decision moi-même et ensuite j'en ai parle à mon medecin	oui, partiellement ou totalement	2	2	2	1	2	1	1	2
9	oui	2	2	1	2	non		oui, partiellement ou totalement	2	2	2	2	2	2	1	2
10	non					oui	j'ai pris la decision moi-même et ensuite j'en ai parle à mon medecin	non pas du tout	2	2	2	2	2	2	2	2
11	oui	1	1	1	2	non		oui, partiellement ou totalement	2	2	2	2	2	2	2	1
12	oui	1	2	1	1	oui	la decision a ete prise en concertation avec le medecin	oui, partiellement ou totalement	2	2	1	2	1	2	2	1
13	oui	2	1	2	2	oui	j'ai pris la decision moi-même et ensuite j'en ai parle à mon medecin	oui, partiellement ou totalement	2	2	2	2	2	2	2	1
14	oui	2	2	2	2	non		oui, partiellement ou totalement	1	2	2	2	2	2	2	2
15	non					non		oui, partiellement ou totalement	1	1	1	1	2	2	1	2
16	non					non		non pas du tout	2	2	2	2	2	2	2	2
17	non					non		non pas du tout	2	2	2	2	2	2	2	2
18	oui	2	1	2	2	non		oui, partiellement ou totalement	2	2	2	2	2	2	2	1
19	oui	2	1	2	2	non		oui, partiellement ou totalement	2	2	2	2	2	2	2	1
20	non					non		non pas du tout	2	2	2	2	2	2	2	2
21	oui	1	2	2	2	non		non pas du tout	2	2	2	2	2	2	2	2
22	oui	1	2	2	2	non		non pas du tout	2	2	2	2	2	2	2	2
23	oui	2	1	1	2	non		oui, partiellement ou totalement	1	2	2	1	2	2	1	2
24	oui	2	1	1	2	non		oui, partiellement ou totalement	1	2	2	1	2	2	1	2
25	oui	2	1	1	2	non		oui, partiellement ou totalement	1	1	2	1	2	2	2	2
26	oui	1	2	2	2	non		oui, partiellement ou totalement	1	2	1	1	2	2	2	2
27	oui	2	1	1	2	non		oui, partiellement ou totalement	1	2	2	2	1	2	1	2
28	oui	2	2	1	2	non		oui, partiellement ou totalement	1	1	1	1	2	2	1	2
29	oui	2	1	1	2	non		non pas du tout	2	2	2	2	2	2	2	2
30	oui	2	2	1	2	non		oui, partiellement ou totalement	1	1	2	2	1	1	1	2
31	non					non		non pas du tout	2	2	2	2	2	2	2	2
32	oui	1	1	1	2	non		non pas du tout	2	2	2	2	2	2	2	2
33	non					non		non pas du tout	2	2	2	2	2	2	2	2
34	oui	2	1	1	2	non		oui, partiellement ou totalement	1	1	2	1	2	2	1	2
35	oui	2	1	1	2	oui	j'ai pris la decision moi-même et je n'en ai pas parle avec mon medecin	non pas du tout	2	2	2	2	2	2	2	2
36	oui	2	1	2	1	oui	la decision a ete prise en concertation avec le medecin	non pas du tout	2	2	2	2	2	2	2	2
37	oui	2	1	2	1	oui	la decision a ete prise en concertation avec le medecin	non pas du tout	2	2	2	2	2	2	2	2
38	oui	2	1	2	2	non		oui, partiellement ou totalement	2	2	2	2	2	2	2	1
39	non					non		non pas du tout	2	2	2	2	2	2	2	2
40	oui	2	1	1	2	non		oui, partiellement ou totalement	1	2	1	1	2	2	1	2
41	oui	2	2	1	2	non		non pas du tout	2	2	2	2	2	2	2	2
42	oui	2	2	1	2	non		oui, partiellement ou totalement	2	2	2	2	2	2	2	1
43	oui	2	1	2	2	non		oui, partiellement ou totalement	2	2	2	2	2	2	2	1
44	non					non		oui, partiellement ou totalement	2	2	2	2	1	1	1	1
45						non		oui, partiellement ou totalement	1	1	1	1	2	2	1	2
46	oui	2	1	1	2	non		oui, partiellement ou totalement	2	2	1	1	2	1	1	2
47	oui	2	1	2	2	non		oui, partiellement ou totalement	1	1	2	1	2	2	1	1
48	oui	2	1	1	2	non		non pas du tout	2	2	2	2	2	2	2	2
49	oui	2	1	1	1	non		oui, partiellement ou totalement	2	2	2	1	2	2	2	2
50	oui	2	1	2	2	non		oui, partiellement ou totalement	1	1	2	1	2	2	1	2
51	non					oui	j'ai pris la decision moi-même et ensuite j'en ai parle à mon medecin	non pas du tout	2	2	2	2	2	2	2	2
52	oui	2	1	1	2	non		oui, partiellement ou totalement	1	2	2	1	2	2	2	2
53	oui	2	2	1	2	non		non pas du tout	2	2	2	2	2	2	2	2
54	oui	2	1	2	2	non		non pas du tout	2	2	2	2	2	2	2	2
55	oui	1	1	2	1	non		oui, partiellement ou totalement	2	1	2	1	2	2	1	2
56	non					non		oui, partiellement ou totalement	1	2	2	1	2	2	1	1
57	oui	2	1	2	2	non		non pas du tout	2	2	2	2	2	2	2	2
58	oui	2	1	1	2	non		oui, partiellement ou totalement	1	2	2	2	2	2	1	2
59	oui	1	2	1	2	non		non pas du tout	2	2	2	2	2	2	2	2
60	oui	2	1	1	2	oui	j'ai pris la decision moi-même et je n'en ai pas parle avec mon medecin	non pas du tout	2	2	2	2	2	2	2	2
61	oui	2	2	1	2	non		non pas du tout	2	2	2	2	2	2	2	2
62	oui	2	2	1	2	non		oui, partiellement ou totalement	2	1	2	1	2	2	2	2
63	oui	2	1	1	2	oui	la decision a ete prise en concertation avec le medecin	oui, partiellement ou totalement	1	2	1	2	2	2	2	2
66	oui	2	2	1	2	non		non pas du tout	2	2	2	2	2	2	2	2
67	oui	2	2	1	2	je n'ai pas de traitement VIH		non pas du tout	2	2	2	2	2	2	2	2
68	oui	2	1	2	2	oui	la decision a ete prise en concertation avec le medecin	non pas du tout	2	2	2	2	2	2	2	2
69	oui	2	1	1	2	non		oui, partiellement ou totalement	2	2	2	2	2	2	2	1
70						non		non pas du tout	2	2	2	2	2	2	2	2
71	oui	2	1	1	2	non		oui, partiellement ou totalement	1	1	2	1	2	1	1	2
72	oui	1	2	2	2	non		non pas du tout	2	2	2	2	2	2	2	2
73	oui	2	2	1	2	non		non pas du tout	2	2	2	2	2	2	2	2
74	oui	2	2	1	2	non		non pas du tout	2	2	2	2	2	2	2	2
75	oui	2	2	1	2	non		oui, partiellement ou totalement	1	2	1	1	2	2	2	2
76	oui	1	2	2	2	non		oui, partiellement ou totalement	1	1	2	1	2	2	1	2
77									2	2	2	2	2	2	2	2
78	oui	2	2	2	1	oui	la decision a ete prise en concertation avec le medecin	non pas du tout	2	2	2	2	2	2	2	2
79	oui	2	2	1	2	non		oui, partiellement ou totalement	1	2	2	1	2	2	2	1
80	oui	2	2	1	2	non		oui, partiellement ou totalement	1	2	2	1	2	2	2	1
81	oui	1	2	1	1	oui	la decision a ete prise en concertation avec le medecin	oui, partiellement ou totalement	1	1	1	2	2	2	1	2
82	non					oui	j'ai pris la decision moi-même et je n'en ai pas parle avec mon medecin	oui, partiellement ou totalement	2	2	2	1	2	2	2	1
83	non					oui	j'ai pris la decision moi-même et ensuite j'en ai parle à mon medecin	non pas du tout	2	2	2	2	2	2	2	2
84	non					non		oui, partiellement ou totalement	1	1	2	1	2	1	1	2
85	non					non		oui, partiellement ou totalement	1	1	2	1	2	1	1	2
86	oui	1	2	2	2	non		oui, partiellement ou totalement	1	2	2	1	2	2	2	2
87	oui	2	1	2	2	oui	j'ai pris la decision moi-même et ensuite j'en ai parle à mon medecin	non pas du tout	2	2	2	2	2	2	2	2
88	oui	1	2	1	2	non		oui, partiellement ou totalement	1	2	2	1	2	1	2	2
90	non					non		non pas du tout	2	2	2	2	2	2	2	2
91	oui	2	1	2	2	non		non pas du tout	2	2	2	2	2	2	2	2
92	oui	2	1	2	2	non		oui, partiellement ou totalement	2	2	2	1	2	1	2	2
93	oui	2	1	2	2	oui	j'ai pris la decision moi-même et je n'en ai pas parle avec mon medecin	oui, partiellement ou totalement	1	1	2	1	1	2	1	2
94	oui	2	1	2	2	non		non pas du tout	2	2	2	2	2	2	2	2
95	oui	2	1	1	2	non		oui, partiellement ou totalement	2	2	2	1	1	2	2	2
97	oui	2	1	1	2	non		non pas du tout	2	2	2	2	2	2	2	2
98	oui	2	2	1	2	non		non pas du tout	2	2	2	2	2	2	2	2
99	oui	1	2	2	1	oui	la decision a ete prise en concertation avec le medecin	oui, partiellement ou totalement	2	2	2	1	2	2	2	2
100	oui	2	1	1	2	non		non pas du tout	2	2	2	2	2	2	2	2
101	oui	1	1	2	2	non		oui, partiellement ou totalement	1	2	2	2	2	2	1	2
102	non					non		oui, partiellement ou totalement	2	2	2	2	2	2	2	1
103	oui	2	1	2	2	non		non pas du tout	2	2	2	2	2	2	2	2
104	oui	1	1	2	1	non		oui, partiellement ou totalement	2	2	2	2	2	2	1	2
105	oui	1	1	1	2	non		oui, partiellement ou totalement	2	2	1	2	2	2	2	2
106	oui	2	1	2	2	non		oui, partiellement ou totalement	2	1	2	1	2	1	2	2
107	oui	2	1	2	2	non		non pas du tout	2	2	2	2	2	2	2	2
108	oui	2	2	1	2	non		oui, partiellement ou totalement	2	1	2	1	1	1	2	2
109	oui	2	2	1	2	oui	j'ai pris la decision moi-même et je n'en ai pas parle avec mon medecin	oui, partiellement ou totalement	2	2	2	2	2	1	2	2
110	oui	1	1	2	2	oui	la decision a ete prise en concertation avec le medecin	oui, partiellement ou totalement	1	2	2	2	2	2	2	1
111	oui	2	2	1	2	non		non pas du tout	2	2	2	2	2	2	2	2
112	oui	2	1	1	2	non		oui, partiellement ou totalement	2	1	2	1	2	1	2	2
113	oui	2	1	1	2	non		oui, partiellement ou totalement	2	2	2	1	2	2	2	2
114	oui	1	1	1	1	oui	j'ai pris la decision moi-même et ensuite j'en ai parle à mon medecin	oui, partiellement ou totalement	1	1	1	2	2	1	1	2
115	oui	2	1	1	1	oui	j'ai pris la decision moi-même et je n'en ai pas parle avec mon medecin	non pas du tout	2	2	2	2	2	2	2	2
116	oui	2	1	2	2	non		non pas du tout	2	2	2	2	2	2	2	2
117	oui	2	2	1	2	non		oui, partiellement ou totalement	1	1	2	1	1	2	2	2
118	oui	2	1	2	2	non		non pas du tout	2	2	2	2	2	2	2	2
119						non		oui, partiellement ou totalement	1	2	2	2	2	2	1	2
120	oui	2	2	1	2	non		non pas du tout	2	2	2	2	2	2	2	2
121	oui	2	2	1	2	non		non pas du tout	2	2	2	2	2	2	2	2
122	oui	1	1	1	2	non		oui, partiellement ou totalement	1	1	2	1	2	2	1	2
123	oui	1	1	1	2	non		oui, partiellement ou totalement	1	1	2	1	2	2	1	2
124	oui	2	2	1	1	non		oui, partiellement ou totalement	1	2	2	1	2	2	2	2
125	oui	1	1	1	2	non		oui, partiellement ou totalement	1	2	2	1	2	1	2	1
127	oui	2	1	1	2	oui	j'ai pris la decision moi-même et ensuite j'en ai parle à mon medecin	non pas du tout	2	2	2	2	2	2	2	2
128	oui	2	2	2	2	non		non pas du tout	2	2	2	2	2	2	2	2
129	non					non		non pas du tout	2	2	2	2	2	2	2	2
130	oui	2	2	1	2	non		oui, partiellement ou totalement	1	2	2	1	2	2	2	2
131	oui	2	1	2	2	oui	j'ai pris la decision moi-même et ensuite j'en ai parle à mon medecin	oui, partiellement ou totalement	1	2	2	2	2	1	2	2
132	non					non		oui, partiellement ou totalement	1	2	2	1	2	2	2	2
133	oui	2	2	1	2	non		non pas du tout	2	2	2	2	2	2	2	2
135	oui	2	1	2	2	oui	j'ai pris la decision moi-même et ensuite j'en ai parle à mon medecin	oui, partiellement ou totalement	1	1	2	2	2	2	1	1
136	oui	2	1	2	2	oui	j'ai pris la decision moi-même et ensuite j'en ai parle à mon medecin	non pas du tout	2	2	2	2	2	2	2	2
137	non					non		non pas du tout	2	2	2	2	2	2	2	2
138	non					non		oui, partiellement ou totalement	2	2	2	1	1	2	2	2
139	oui	2	1	1	2	oui	j'ai pris la decision moi-même et ensuite j'en ai parle à mon medecin	non pas du tout	2	2	2	2	2	2	2	2
140	oui	2	1	1	2	non		non pas du tout	2	2	2	2	2	2	2	2
141	oui	1	2	2	2	oui	j'ai pris la decision moi-même et ensuite j'en ai parle à mon medecin	non pas du tout	2	2	2	2	2	2	2	2
142	non					oui	j'ai pris la decision moi-même et ensuite j'en ai parle à mon medecin	non pas du tout	2	2	2	2	2	2	2	2
143	non					non		non pas du tout	2	2	2	2	2	2	2	2
144	non					oui	j'ai pris la decision moi-même et ensuite j'en ai parle à mon medecin	oui, partiellement ou totalement	2	2	2	2	2	2	2	1
145	oui	2	1	1	2	non		non pas du tout	2	2	2	2	2	2	2	2
146	oui	1	1	1	2	non		non pas du tout	2	2	2	2	2	2	2	2
147	oui	1	1	2	2	non		oui, partiellement ou totalement	1	2	2	2	2	2	1	2
148	non					non		oui, partiellement ou totalement	1	1	2	1	2	1	1	2
149	non					non		non pas du tout	2	2	2	2	2	2	2	2
150	non					oui	j'ai pris la decision moi-même et ensuite j'en ai parle à mon medecin	non pas du tout	2	2	2	2	2	2	2	2
151	oui	2	1	1	1	non		non pas du tout	2	2	2	2	2	2	2	2
152	oui	2	1	1	2	oui	la decision a ete prise en concertation avec le medecin	oui, partiellement ou totalement	2	2	2	1	1	2	1	2
153	oui	2	1	2	2	non		oui, partiellement ou totalement	2	2	2	2	2	1	1	2
154	non					non		oui, partiellement ou totalement	2	2	2	2	2	2	2	1
155	non					oui	j'ai pris la decision moi-même et je n'en ai pas parle avec mon medecin	oui, partiellement ou totalement	1	2	2	2	2	2	2	2
156	oui	2	1	2	2	non		non pas du tout	2	2	2	2	2	2	2	2
157	oui	1	1	1	2	non		oui, partiellement ou totalement	1	1	2	1	2	2	1	2
158						non		non pas du tout	2	2	2	2	2	2	2	2
159	oui	2	2	2	2	non		oui, partiellement ou totalement	1	1	2	2	2	2	2	2
160	oui	2	2	1	2	non		non pas du tout	2	2	2	2	2	2	2	2
161	oui	1	1	1	2	non		oui, partiellement ou totalement	2	2	2	2	2	2	2	1
162	oui	2	1	1	2	non		non pas du tout	2	2	2	2	2	2	2	2
163	oui	2	1	1	2	non		oui, partiellement ou totalement	1	2	2	2	2	2	1	2
164	oui	2	2	1	2	oui	j'ai pris la decision moi-même et je n'en ai pas parle avec mon medecin	non pas du tout	2	2	2	2	2	2	2	2
165	oui	2	1	2	2	non		non pas du tout	2	2	2	2	2	2	2	2
166	oui	2	1	2	2	non		oui, partiellement ou totalement	2	2	2	2	2	2	1	2
167	oui	2	1	1	2	non		oui, partiellement ou totalement	1	2	2	1	2	2	1	1
169	oui	1	2	2	2	non		oui, partiellement ou totalement	1	1	2	2	1	2	1	2
170	oui	2	2	2	2	non		non pas du tout	2	2	2	2	2	2	2	2
171	non					non		oui, partiellement ou totalement	2	2	2	1	1	2	2	2
172	oui	2	1	2	2	non		oui, partiellement ou totalement	2	2	2	2	2	2	1	2
173	non					non		oui, partiellement ou totalement	1	2	2	2	2	1	1	2
174	non					non		non pas du tout	2	2	2	2	2	2	2	2
175	oui	2	1	2	2	oui	la decision a ete prise en concertation avec le medecin	oui, partiellement ou totalement	2	2	2	2	2	2	2	2
176	oui	2	1	2	2	non		oui, partiellement ou totalement	2	2	2	2	1	2	2	2
177	oui	1	1	1	2	oui	j'ai pris la decision moi-même et je n'en ai pas parle avec mon medecin	oui, partiellement ou totalement	2	2	2	2	2	2	1	2
179	oui	2	2	2	2	non		oui, partiellement ou totalement	1	2	2	1	2	2	1	2
180	oui	2	2	1	2	non		non pas du tout	2	2	2	2	2	2	2	2
181	oui	2	1	2	2	oui	j'ai pris la decision moi-même et ensuite j'en ai parle à mon medecin	non pas du tout	2	2	2	2	2	2	2	2
182	non					oui	j'ai pris la decision moi-même et ensuite j'en ai parle à mon medecin	non pas du tout	2	2	2	2	2	2	2	2
183	oui	2	2	1	2	non		non pas du tout	2	2	2	2	2	2	2	2
184	oui	2	1	1	1	oui	j'ai pris la decision moi-même et je n'en ai pas parle avec mon medecin	oui, partiellement ou totalement	2	1	2	1	2	2	1	2
185	non					non		non pas du tout	2	2	2	2	2	2	2	2
186	oui	2	1	2	2	oui	j'ai pris la decision moi-même et ensuite j'en ai parle à mon medecin	oui, partiellement ou totalement	2	1	2	2	2	2	1	2
187								non pas du tout	2	2	2	2	2	2	2	2
188	non					non		oui, partiellement ou totalement	1	2	2	1	2	2	2	2
189	oui	2	1	1	2	non		oui, partiellement ou totalement	1	1	2	1	2	2	1	2
190	oui	2	1	2	2	non		non pas du tout	2	2	2	2	2	2	2	2
191	oui	2	1	1	2	non		oui, partiellement ou totalement	2	2	2	1	2	2	1	2
192	oui	1	2	2	2	oui	j'ai pris la decision moi-même et ensuite j'en ai parle à mon medecin	oui, partiellement ou totalement	2	2	2	2	2	2	2	1
193						non		non pas du tout	2	2	2	2	2	2	2	2
194	oui	2	1	2	2	non		oui, partiellement ou totalement	2	2	2	2	2	2	2	1
195	oui	1	2	1	1	oui	j'ai pris la decision moi-même et ensuite j'en ai parle à mon medecin	oui, partiellement ou totalement	1	2	1	1	2	1	1	2
196	oui	2	2	1	2	non		oui, partiellement ou totalement	1	2	2	1	2	1	2	2
197	non					non		non pas du tout	2	2	2	2	2	2	2	2
198	oui	1	2	1	2	non		oui, partiellement ou totalement	2	2	2	1	2	2	1	1
199	oui	2	1	1	2	non		non pas du tout	2	2	2	2	2	2	2	2
200	oui	2	1	2	2	non		oui, partiellement ou totalement	1	2	2	2	2	2	2	2
201	oui	1	2	1	2	non		oui, partiellement ou totalement	1	2	2	2	2	2	2	2
202	oui	1	2	2	2	non		oui, partiellement ou totalement	2	2	2	2	2	2	1	2
203	non					non		oui, partiellement ou totalement	2	2	2	2	2	2	2	2
204	oui	1	2	2	2	non		oui, partiellement ou totalement	2	2	2	2	2	2	2	1
205	oui	1	1	1	2	non		oui, partiellement ou totalement	2	2	2	2	1	2	2	2
206	oui	2	2	2	1	oui	j'ai pris la decision moi-même et ensuite j'en ai parle à mon medecin	oui, partiellement ou totalement	2	2	2	2	2	2	2	1
207	non								2	2	2	2	2	2	2	2
208	oui	2	1	2	2			non pas du tout	2	2	2	2	2	2	2	2
209	non					non		oui, partiellement ou totalement	1	2	2	2	2	2	2	2
210	oui	1	1	2	2	oui	j'ai pris la decision moi-même et ensuite j'en ai parle à mon medecin	non pas du tout	2	2	2	2	2	2	2	2
211	non								2	2	2	2	2	2	2	2
212	oui	2	1	1	2	oui	la decision a ete prise en concertation avec le medecin	oui, partiellement ou totalement	1	2	2	1	2	2	2	2
213	oui	1	2	2	2	oui	j'ai pris la decision moi-même et ensuite j'en ai parle à mon medecin	oui, partiellement ou totalement	2	2	2	2	2	1	2	2
214	non					non		oui, partiellement ou totalement	1	2	2	2	2	2	2	2
215	oui	1	2	1	2	non		oui, partiellement ou totalement	2	2	2	2	2	2	2	2
216	non					non		non pas du tout	2	2	2	2	2	2	2	2
217	oui	2	1	1	2			non pas du tout	2	2	2	2	2	2	2	2
218	oui	2	1	1	2	oui	j'ai pris la decision moi-même et ensuite j'en ai parle à mon medecin	oui, partiellement ou totalement	1	2	2	2	2	2	2	2
219	oui	2	1	1	2	non		non pas du tout	2	2	2	2	2	2	2	2
220	oui	2	1	2	2	non		oui, partiellement ou totalement	2	2	1	2	2	2	2	1
221	oui	2	1	2	2	oui	j'ai pris la decision moi-même et je n'en ai pas parle avec mon medecin	oui, partiellement ou totalement	2	2	2	2	1	2	1	2
222	oui	2	1	2	2	non		oui, partiellement ou totalement	1	2	2	1	2	2	1	2
223	oui	1	1	2	2	non		non pas du tout	2	2	2	2	2	2	2	2
224	oui	2	2	1	2	non		oui, partiellement ou totalement	2	2	2	2	2	2	2	1
225	non					non		non pas du tout	2	2	2	2	2	2	2	2
226	oui	2	2	1	2	non		non pas du tout	2	2	2	2	2	2	2	2
227	oui	2	1	2	2	non		non pas du tout	2	2	2	2	2	2	2	2
228	oui	1	2	2	2	non		non pas du tout	2	2	2	2	2	2	2	2
229	non					non		non pas du tout	2	2	2	2	2	2	2	2
232	non					non		non pas du tout	2	2	2	2	2	2	2	2
235	oui	2	1	2	2	non		oui, partiellement ou totalement	1	2	2	2	2	2	2	2
236	oui	2	2	1	2	non		oui, partiellement ou totalement	1	2	2	2	2	2	1	2
237	oui	1	1	1	2	non		oui, partiellement ou totalement	1	2	2	1	2	2	1	2
238	oui	1	1	1	2	non		oui, partiellement ou totalement	1	2	2	1	2	2	1	2
239	oui	1	1	1	2	non		non pas du tout	2	2	2	2	2	2	2	2
240	oui	1	1	1	2	oui	la decision a ete prise en concertation avec le medecin	non pas du tout	2	2	2	2	2	2	2	2
241	oui	1	2	2	2	non		oui, partiellement ou totalement	2	2	2	2	2	2	2	1
242	oui	2	1	1	2	non		oui, partiellement ou totalement	2	2	2	2	2	2	2	1
243	oui	2	1	2	2	oui	j'ai pris la decision moi-même et je n'en ai pas parle avec mon medecin	oui, partiellement ou totalement	1	1	2	1	2	2	1	1
244	non					non		non pas du tout	2	2	2	2	2	2	2	2
245	oui	1	2	1	2	non		oui, partiellement ou totalement	2	2	2	2	2	2	2	1
246	non					non		non pas du tout	2	2	2	2	2	2	2	2
247	oui	2	1	1	1	non		oui, partiellement ou totalement	2	2	2	1	2	2	1	2
248	oui	1	1	1	1	non		oui, partiellement ou totalement	2	2	2	2	2	2	2	1
249	oui	2	2	1	2	non		non pas du tout	2	2	2	2	2	2	2	2
250	oui	2	2	1	2	non		non pas du tout	2	2	2	2	2	2	2	2
251	oui	2	1	1	2	non		oui, partiellement ou totalement	2	1	2	2	1	2	1	2
252	oui	2	1	2	2	non		oui, partiellement ou totalement	2	2	2	2	2	1	2	2
253	non					non		non pas du tout	2	2	2	2	2	2	2	2
254	oui	2	2	1	2	non		oui, partiellement ou totalement	2	2	2	2	2	2	1	1
256	oui	2	2	1	2			oui, partiellement ou totalement	1	2	2	2	2	2	2	2
257	oui	2	1	1	2	non		oui, partiellement ou totalement	2	2	2	2	2	2	2	1
258	non					non		non pas du tout	2	2	2	2	2	2	2	2
259	oui	2	2	1	2	non		oui, partiellement ou totalement	2	2	2	2	2	2	1	2
260	oui	2	2	1	2	non		oui, partiellement ou totalement	2	2	2	2	2	2	1	2
261	oui	2	2	1	2	oui	j'ai pris la decision moi-même et je n'en ai pas parle avec mon medecin	non pas du tout	2	2	2	2	2	2	2	2
262	non					non		non pas du tout	2	2	2	2	2	2	2	2
263						non		non pas du tout	2	2	2	2	2	2	2	2
264	oui	1	2	2	2	non		oui, partiellement ou totalement	2	1	2	1	2	2	2	2
265	oui	1	2	2	2	non		oui, partiellement ou totalement	2	1	2	1	2	2	2	2
266	oui	2	2	1	2	non		oui, partiellement ou totalement	2	2	2	1	2	2	2	2
267	oui	2	1	1	2	non		non pas du tout	2	2	2	2	2	2	2	2
268	oui	1	2	2	2	non		non pas du tout	2	2	2	2	2	2	2	2
269	oui	1	2	2	2	oui	j'ai pris la decision moi-même et ensuite j'en ai parle à mon medecin	non pas du tout	2	2	2	2	2	2	2	2
270	oui	1	2	2	2	non		non pas du tout	2	2	2	2	2	2	2	2
271	oui					oui	j'ai pris la decision moi-même et ensuite j'en ai parle à mon medecin	oui, partiellement ou totalement	2	2	2	1	2	2	2	2
272	oui	1	2	2	2	oui	j'ai pris la decision moi-même et ensuite j'en ai parle à mon medecin	oui, partiellement ou totalement	2	2	1	2	2	1	2	2
273	oui	1	2	2	2	oui	la decision a ete prise en concertation avec le medecin	non pas du tout	2	2	2	2	2	2	2	2
274	oui	2	2	2	1	oui	la decision a ete prise en concertation avec le medecin	oui, partiellement ou totalement	1	2	2	2	2	2	2	2
275	oui	2	1	1	2	non		oui, partiellement ou totalement	1	2	2	1	2	2	1	2
276	oui	2	2	1	2	non		non pas du tout	2	2	2	2	2	2	2	2
277	non					oui	la decision a ete prise en concertation avec le medecin	non pas du tout	2	2	2	2	2	2	2	2
278	non					non		non pas du tout	2	2	2	2	2	2	2	2
279	oui	2	2	1	2	non		oui, partiellement ou totalement	2	2	2	1	2	2	2	2
280	oui	1	1	2	2	oui	j'ai pris la decision moi-même et ensuite j'en ai parle à mon medecin	oui, partiellement ou totalement	2	2	2	2	2	2	1	2
281	oui	2	1	2	1	oui	j'ai pris la decision moi-même et ensuite j'en ai parle à mon medecin	oui, partiellement ou totalement	1	1	2	1	2	2	1	2
282	oui	2	2	1	2	non		non pas du tout	2	2	2	2	2	2	2	2
283						non			2	2	2	2	2	2	2	2
284	oui	2	1	2	2	non		oui, partiellement ou totalement	2	2	1	1	2	2	1	2
285	oui	2	2	1	2	oui	j'ai pris la decision moi-même et je n'en ai pas parle avec mon medecin	oui, partiellement ou totalement	1	2	2	1	2	2	2	2
286	oui	1	1	1	2	non		oui, partiellement ou totalement	1	2	2	1	2	1	2	2
287	oui	2	1	1	1	non		oui, partiellement ou totalement	1	2	2	2	2	1	1	1
288	non					non		oui, partiellement ou totalement	1	2	2	1	2	2	2	2
289	oui	2	2	1	2	oui	j'ai pris la decision moi-même et je n'en ai pas parle avec mon medecin	non pas du tout	2	2	2	2	2	2	2	2
290	oui	2	2	1	2	oui	j'ai pris la decision moi-même et je n'en ai pas parle avec mon medecin	non pas du tout	2	2	2	2	2	2	2	2
292	non					oui	la decision a ete prise en concertation avec le medecin	oui, partiellement ou totalement	1	1	1	2	1	2	1	2
293	oui	2	1	2	2	non		non pas du tout	2	2	2	2	2	2	2	2
294	non					non		non pas du tout	2	2	2	2	2	2	2	2
295	oui	1	2	2	2	non		oui, partiellement ou totalement	1	2	2	2	2	2	2	2
296	oui	2	1	1	2	non		non pas du tout	2	2	2	2	2	2	2	2
297	oui	1	1	1	2	oui	la decision a ete prise en concertation avec le medecin	non pas du tout	2	2	2	2	2	2	2	2
298	oui	1	1	1	2	oui	la decision a ete prise en concertation avec le medecin	non pas du tout	2	2	2	2	2	2	2	2
299	oui	2	2	1	2	non		oui, partiellement ou totalement	1	2	1	2	2	2	2	2
300	oui	1	2	1	2	oui	j'ai pris la decision moi-même et je n'en ai pas parle avec mon medecin	non pas du tout	2	2	2	2	2	2	2	2
301	oui	1	1	1	2	non		oui, partiellement ou totalement	2	2	2	2	2	2	1	2
302	oui	2	2	1	2	non		oui, partiellement ou totalement	1	2	1	2	2	2	2	2
303	oui	1	1	2	1	non		oui, partiellement ou totalement	1	2	1	1	2	2	1	2
304	oui	2	2	1	2	oui	j'ai pris la decision moi-même et ensuite j'en ai parle à mon medecin	oui, partiellement ou totalement	2	2	1	2	2	2	2	2
305	oui	2	1	2	2	oui	j'ai pris la decision moi-même et ensuite j'en ai parle à mon medecin	non pas du tout	2	2	2	2	2	2	2	2
306	oui	1	2	2	2	oui	j'ai pris la decision moi-même et ensuite j'en ai parle à mon medecin	oui, partiellement ou totalement	1	1	1	2	2	1	1	2
307	oui	1	2	2	2	non		oui, partiellement ou totalement	2	2	2	1	2	2	2	1
308	non					non		oui, partiellement ou totalement	1	1	2	2	2	2	1	2
309	non					non		non pas du tout	2	2	2	2	2	2	2	2
310	oui	1	1	2	2	non		oui, partiellement ou totalement	2	2	2	1	2	2	1	2
311	oui	1	1	1	2	non		non pas du tout	2	2	2	2	2	2	2	2
312	non					non		oui, partiellement ou totalement	2	2	2	2	2	2	2	1
313	oui	2	1	1	2	non		oui, partiellement ou totalement	1	2	2	2	2	2	2	2
314	oui	1	2	2	2	non			2	2	2	2	2	2	2	2
315	oui	1	2	2	2	oui	la decision a ete prise en concertation avec le medecin	oui, partiellement ou totalement	2	2	2	2	2	1	1	2
